# Supplementary material for: Technical note: Reconstructing surface missing aerosol elemental carbon data in long-term series with ensemble learning
Source: Copernicus journal article supplement (doi:10.5194/egusphere-2024-2776), 2024-11-25
Supplement: Supplementary file 1 [file egusphere-2024-2776-supplement.pdf]

## Supporting Information for

# Technical note: Reconstructing surface missing aerosol elemental carbon data in long-term series with ensemble learning

Qingxiao Meng<sup>1</sup>, Yunjiang Zhang<sup>1\*</sup>, Sheng Zhong<sup>2</sup>, Jie Fang<sup>1</sup>, Lili Tang<sup>3</sup>, Yongcai Rao<sup>4</sup>, Minfeng Zhou<sup>5</sup>, Jian Qiu<sup>6</sup>, Xiaofeng Xu<sup>7</sup>, Jean-Eudes Petit<sup>8</sup>, Olivier Favez<sup>9</sup>, Xinlei Ge<sup>1</sup>

<sup>1</sup>Collaborative Innovation Center of Atmospheric Environment and Equipment Technology, Jiangsu Key Laboratory of Atmospheric Environment Monitoring and Pollution Control, School of Environmental Science and Engineering, Nanjing University of Information Science and Technology, Nanjing 210044, China

<sup>2</sup>Jiangsu Environmental Monitoring Center, Nanjing, China

<sup>3</sup>Nanjing Rayleigh Scientific Instruments Co., Ltd., Nanjing, China

<sup>4</sup>Xuzhou Environmental Monitoring Center of Jiangsu, Xuzhou, China

<sup>5</sup>Suzhou Environmental Monitoring Center of Jiangsu, Suzhou, China

<sup>6</sup>Zhenjiang Environmental Monitoring Center of Jiangsu, Zhenjiang, China

<sup>7</sup>Key Laboratory for Aerosol-Cloud-Precipitation of China Meteorological Administration, School of Atmospheric Physics, Nanjing University of Information Science and Technology, Nanjing 210044, China

<sup>8</sup>Laboratoire des Sciences du Climat et de l'Environnement, CEA/Orme des Merisiers, Gif sur Yvette, France

<sup>9</sup>Institut National de l'Environnement Industriel et des Risques, Verneuil-en-Halatte, France

*Correspondence to:* Yunjiang Zhang ([yjzhang@nuist.edu.cn](mailto:yjzhang@nuist.edu.cn))

### Contents of this file

Figures S1 to S6

Tables S1 to S7

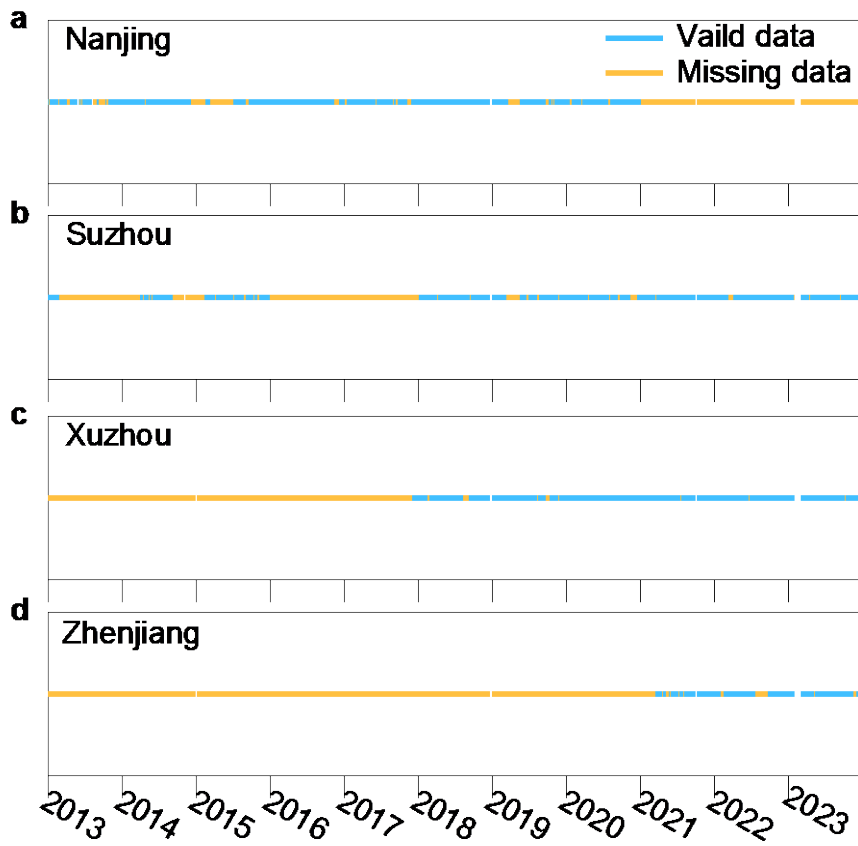

**Figure S1.** The amount of the valid data and missing data from 2013 to 2023 in the four cities: a. Nanjing, b. Suzhou, c. Xuzhou, and d. Zhenjiang. The blue line represents the amount of valid ground observation data, while the yellow line represents the amount of missing data reconstructed using the ensemble learning model.

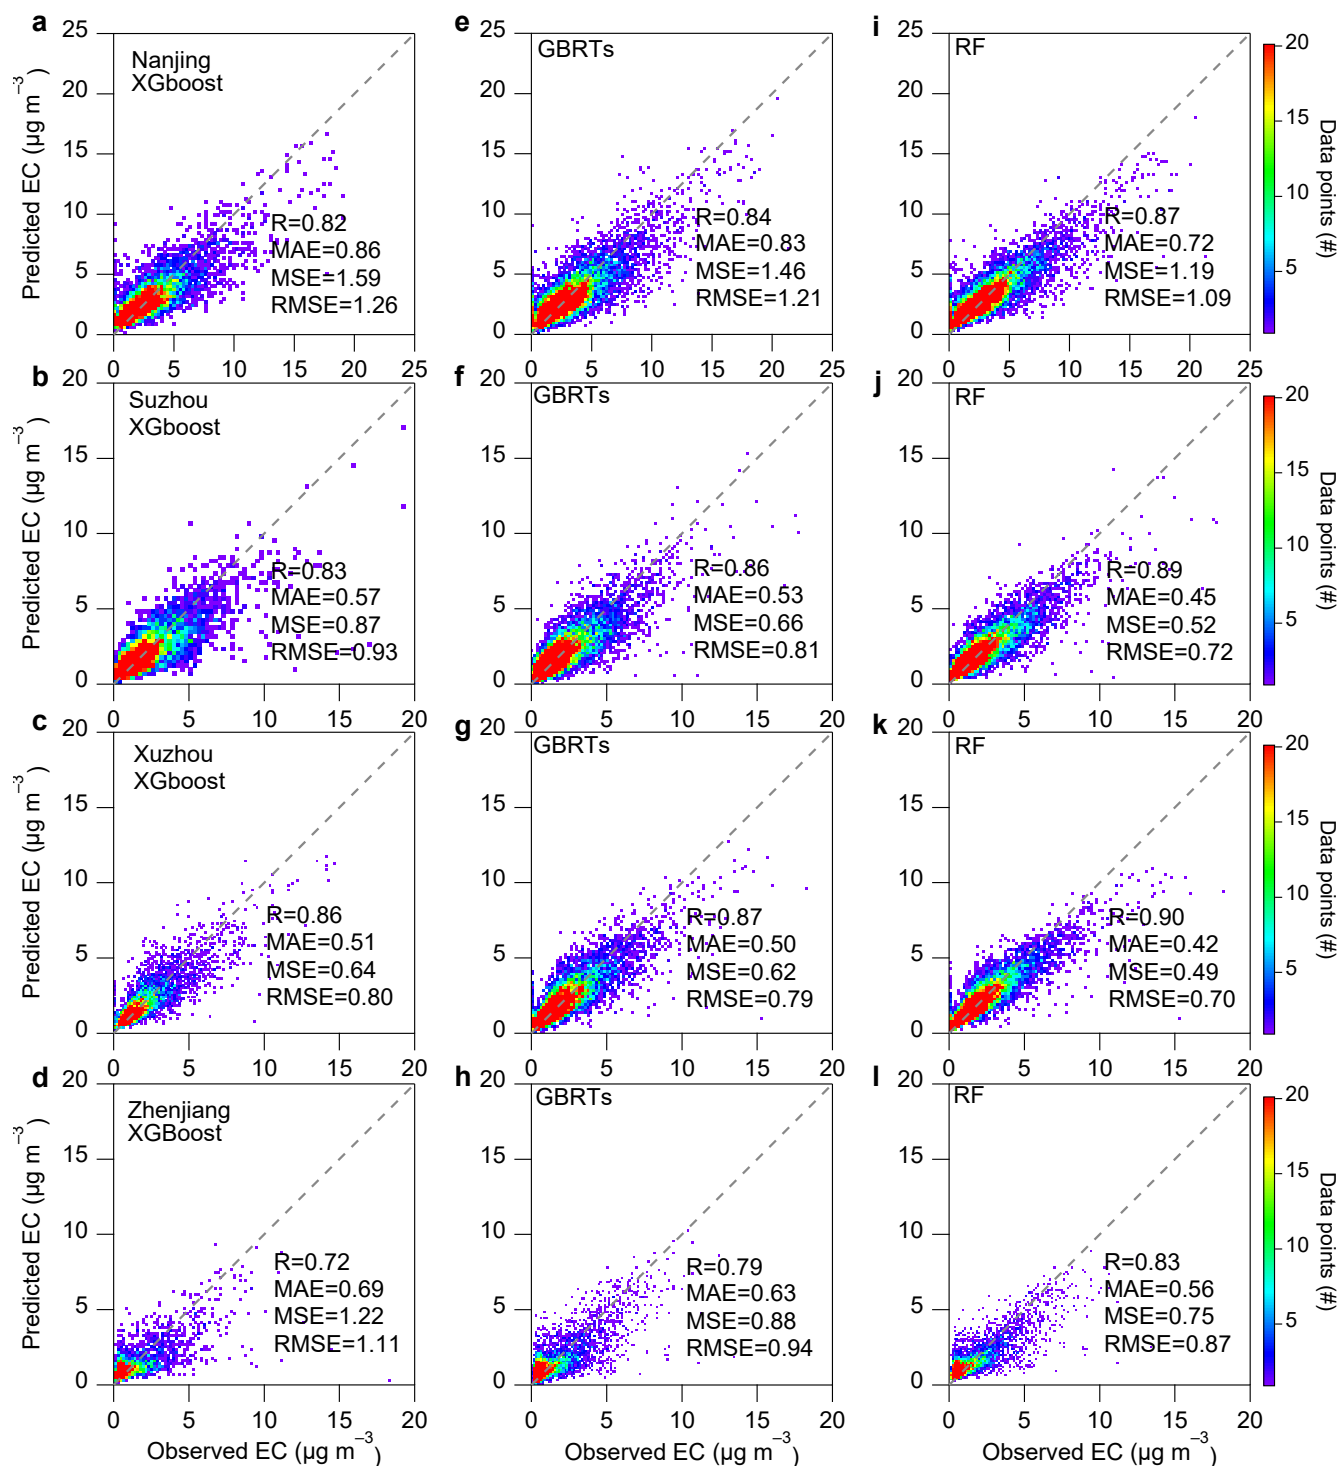

**Figure S2.** Performance evaluation of three machine learning models using the test set for reconstructing EC observation data (a-d, XGBoost; e-h, GBRTs; i-l, Random Forests).

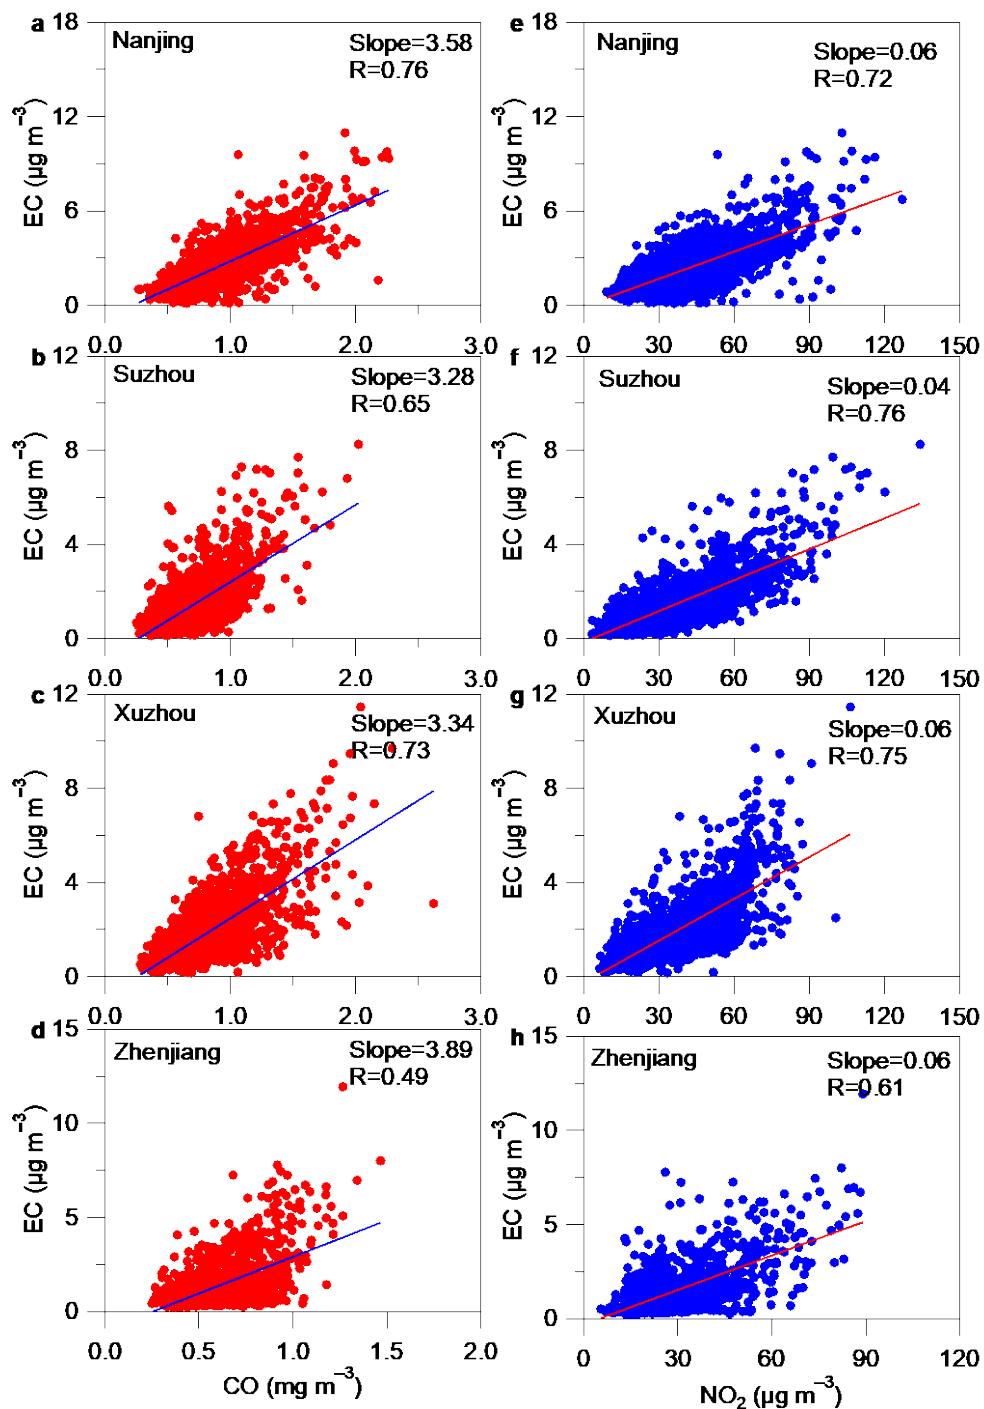

Figure S3. Correlation analysis between observed EC with CO and  $\text{NO}_2$ , respectively.

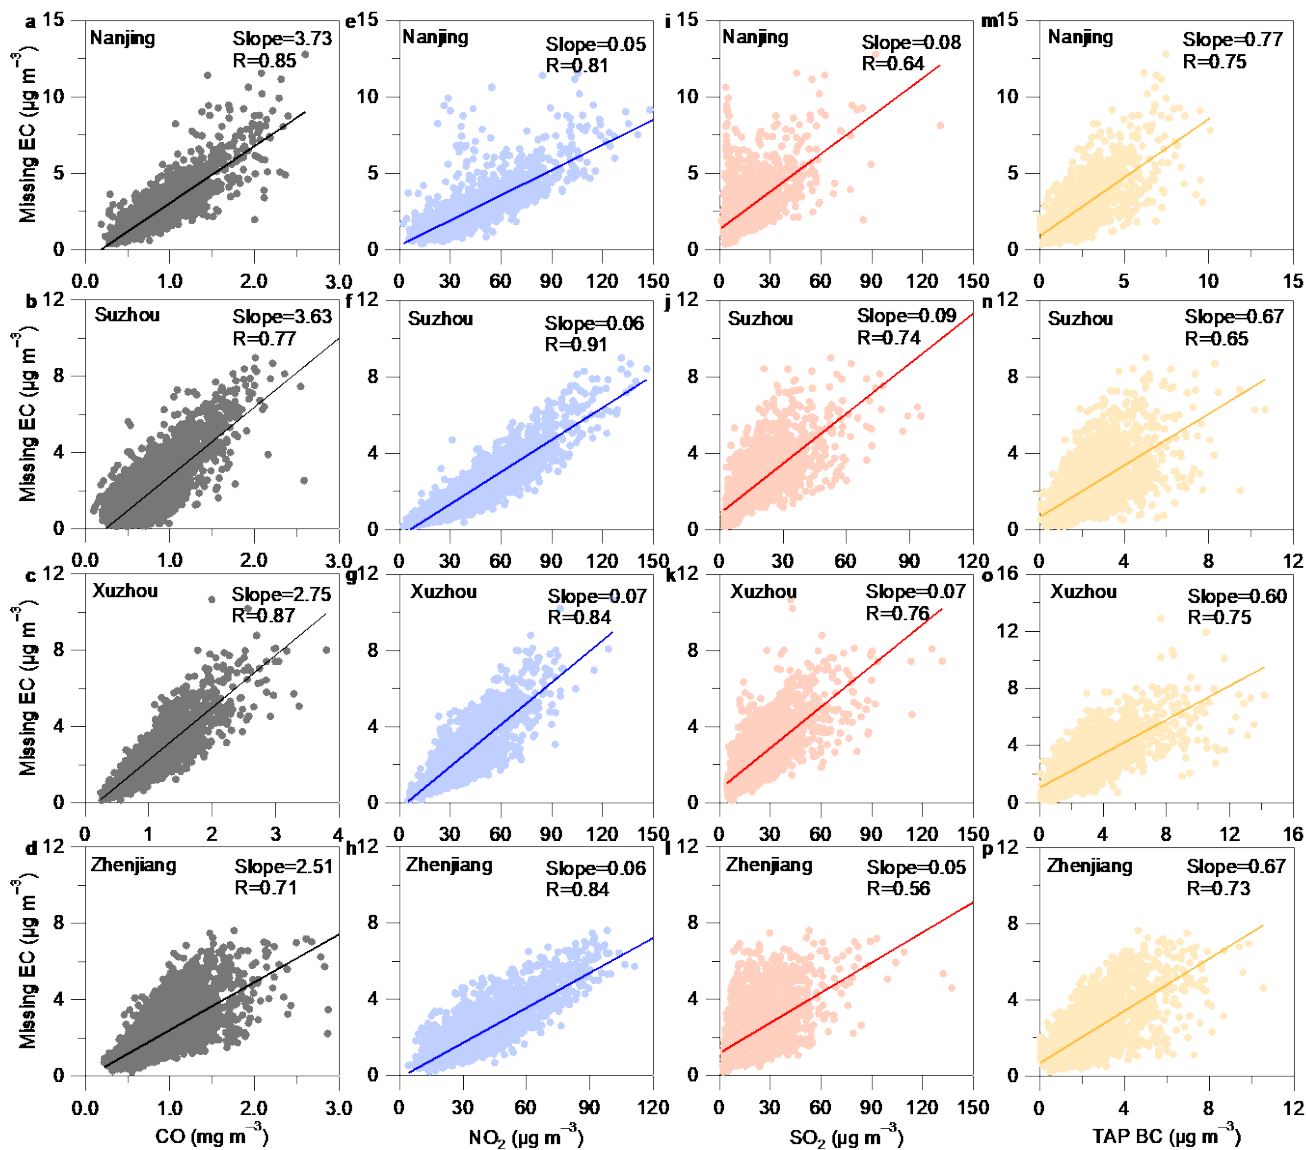

Figure S4. Correlation analysis between reconstructed EC and observed CO, SO<sub>2</sub>, NO<sub>2</sub> and TAP BC.

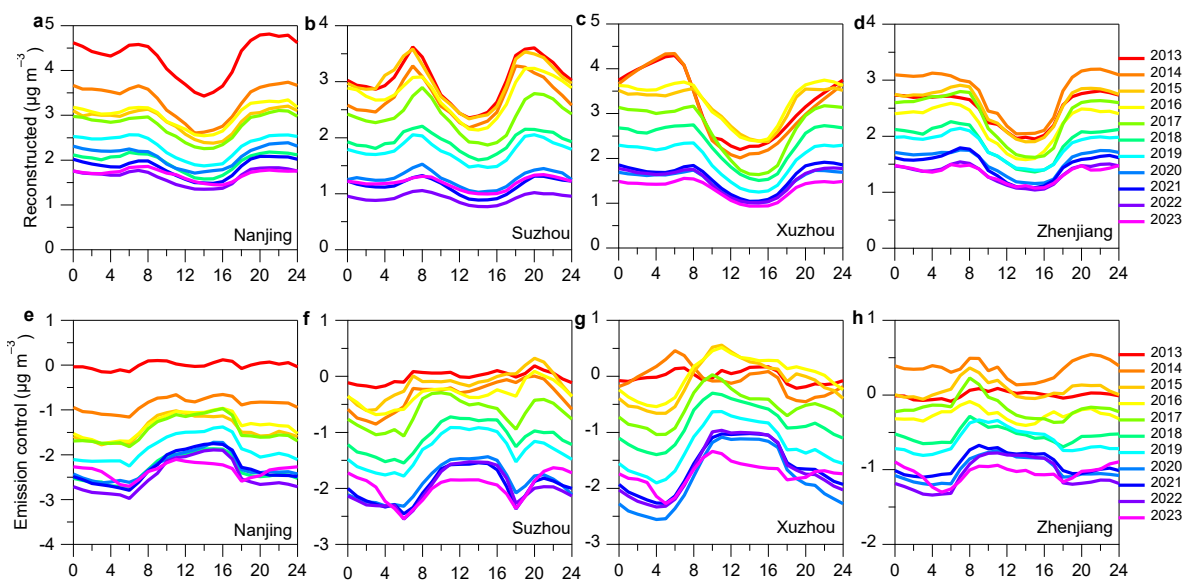

**Figure S5.** Annually diurnal variation of EC concentration. **a-d** Diurnal variation of EC in each year from 2013 to 2023. **e-h** Diurnal variation of emission-driven EC.

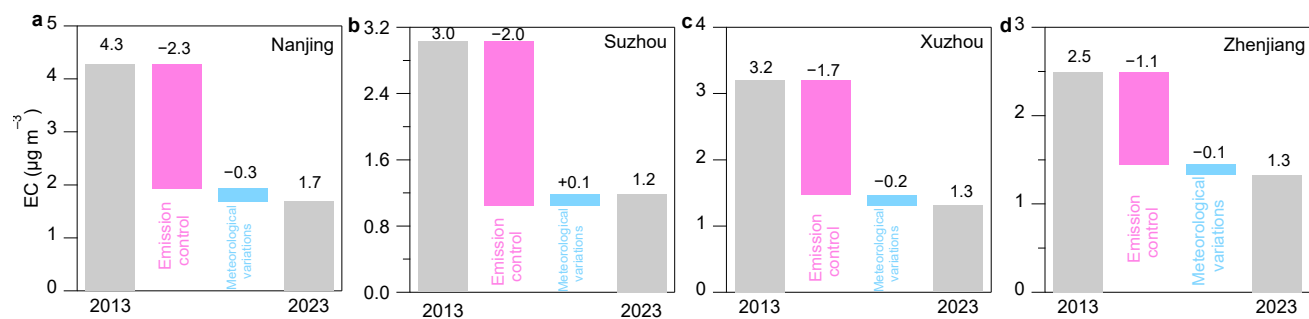

**Figure S6.** The contributions of EC concentration changes driven by anthropogenic emission control and meteorological conditions in four cities during 2013 and 2023.

**Table S1.** Summarization of field campaigns at four sites.

| City      | Longitude | Latitude |
|-----------|-----------|----------|
| Nanjing   | 118.7538° | 32.0551° |
| Suzhou    | 120.628°  | 31.2864° |
| Xuzhou    | 117.256°  | 34.2153° |
| Zhenjiang | 119.6707  | 32.1875° |



**Table S2.** Comparison Table of Meteorological Variables

| Variable abbreviations | Meteorological variables                      | Unit              |
|------------------------|-----------------------------------------------|-------------------|
| U10                    | 10m u-component of wind                       | $\text{m s}^{-1}$ |
| V10                    | 10m v-component of wind                       | $\text{m s}^{-1}$ |
| U850                   | 850hPa u-component of wind                    | $\text{m s}^{-1}$ |
| V850                   | 850hPa v-component of wind                    | $\text{m s}^{-1}$ |
| W850                   | 850hPa w-component of wind                    | $\text{m s}^{-1}$ |
| U650                   | 650hPa u-component of wind                    | $\text{m s}^{-1}$ |
| V650                   | 650hPa v-component of wind                    | $\text{m s}^{-1}$ |
| W650                   | 650hPa w-component of wind                    | $\text{m s}^{-1}$ |
| U500                   | 500hPa u-component of wind                    | $\text{m s}^{-1}$ |
| V500                   | 500hPa v-component of wind                    | $\text{m s}^{-1}$ |
| W500                   | 500hPa w-component of wind                    | $\text{m s}^{-1}$ |
| Tmx                    | Maximum 2m temperature                        | K                 |
| BLH                    | Boundary layer height                         | m                 |
| RH                     | Relative Humidity                             | Dimensionless     |
| SR                     | Mean surface direct short-wave radiation flux | $\text{W m}^{-2}$ |
| SP                     | Mean sea level pressure                       | Pa                |
| TCC                    | Total cloud cover                             | Dimensionless     |
| TP                     | Total precipitation                           | m                 |

**Table S3.** Annual mean EC concentration data for the four representative cities in the Yangtze River Delta (Nanjing, Suzhou, Xuzhou, and Yangzhou) from 2013 to 2023.

| Year | Nanjing<br>( $\mu\text{g m}^{-3}$ ) | Suzhou<br>( $\mu\text{g m}^{-3}$ ) | Xuzhou<br>( $\mu\text{g m}^{-3}$ ) | Zhenjiang<br>( $\mu\text{g m}^{-3}$ ) |
|------|-------------------------------------|------------------------------------|------------------------------------|---------------------------------------|
| 2013 | 4.28                                | 3.03                               | 3.21                               | 2.50                                  |
| 2014 | 3.33                                | 2.72                               | 3.11                               | 2.78                                  |
| 2015 | 2.89                                | 2.99                               | 3.17                               | 2.54                                  |
| 2016 | 3.01                                | 2.76                               | 3.26                               | 2.21                                  |
| 2017 | 2.76                                | 2.38                               | 2.64                               | 2.34                                  |
| 2018 | 1.97                                | 1.93                               | 2.30                               | 1.89                                  |
| 2019 | 2.32                                | 1.77                               | 1.94                               | 1.82                                  |
| 2020 | 2.09                                | 1.27                               | 1.47                               | 1.54                                  |
| 2021 | 1.84                                | 1.14                               | 1.57                               | 1.48                                  |
| 2022 | 1.63                                | 0.92                               | 1.49                               | 1.34                                  |
| 2023 | 1.69                                | 1.19                               | 1.32                               | 1.33                                  |

**Table S4.** Performance evaluation of test set for driving factor analysis model.

| City      | Method  | R    | MAE  | MSE  | RMSE |
|-----------|---------|------|------|------|------|
| Nanjing   | XGBoost | 0.88 | 0.97 | 2.02 | 1.42 |
| Nanjing   | GBRTs   | 0.90 | 0.86 | 1.54 | 1.24 |
| Nanjing   | RF      | 0.92 | 0.76 | 1.35 | 1.16 |
| Nanjing   | EL      | 0.96 | 0.52 | 0.62 | 0.79 |
| Suzhou    | XGBoost | 0.85 | 0.72 | 1.10 | 1.05 |
| Suzhou    | GBRTs   | 0.87 | 0.63 | 0.86 | 0.93 |
| Suzhou    | RF      | 0.89 | 0.58 | 0.81 | 0.90 |
| Suzhou    | EL      | 0.96 | 0.38 | 0.32 | 0.56 |
| Xuzhou    | XGBoost | 0.82 | 0.71 | 1.17 | 1.08 |
| Xuzhou    | GBRTs   | 0.86 | 0.62 | 0.93 | 0.97 |
| Xuzhou    | RF      | 0.88 | 0.56 | 0.92 | 0.96 |
| Xuzhou    | EL      | 0.95 | 0.36 | 0.33 | 0.58 |
| Zhenjiang | XGBoost | 0.89 | 0.52 | 0.50 | 0.71 |
| Zhenjiang | GBRTs   | 0.91 | 0.47 | 0.40 | 0.63 |
| Zhenjiang | RF      | 0.93 | 0.42 | 0.34 | 0.59 |
| Zhenjiang | EL      | 0.96 | 0.28 | 0.17 | 0.41 |

**Table S5.** Correlation analysis of data from the Reconstructed, MERRA-2, and Modeled methods with ground-based observation data.

| City      | Data          | R    | Slope |
|-----------|---------------|------|-------|
| Nanjing   | Reconstructed | 0.97 | 0.86  |
| Nanjing   | MERRA-2       | 0.61 | 0.64  |
| Nanjing   | Modeled       | 0.68 | 0.54  |
| Suzhou    | Reconstructed | 0.97 | 0.88  |
| Suzhou    | MERRA-2       | 0.59 | 0.87  |
| Suzhou    | Modeled       | 0.68 | 0.55  |
| Xuzhou    | Reconstructed | 0.98 | 0.89  |
| Xuzhou    | MERRA-2       | 0.72 | 1.27  |
| Xuzhou    | Modeled       | 0.76 | 0.92  |
| Zhenjiang | Reconstructed | 0.97 | 0.87  |
| Zhenjiang | MERRA-2       | 0.69 | 0.95  |
| Zhenjiang | Modeled       | 0.65 | 0.38  |

**Table S6.** The results of the Mann-Kendall Test (MK) in this study are compared to those obtained using the De-weathered method.

| City      | Method       | Slope  | P <sub>value</sub> |
|-----------|--------------|--------|--------------------|
| Nanjing   | De-weathered | -0.208 | <0.05              |
| Nanjing   | FEA          | -0.214 | <0.05              |
| Suzhou    | De-weathered | -0.221 | <0.05              |
| Suzhou    | FEA          | -0.229 | <0.05              |
| Xuzhou    | De-weathered | -0.221 | <0.05              |
| Xuzhou    | FEA          | -0.204 | <0.05              |
| Zhenjiang | De-weathered | -0.142 | <0.05              |
| Zhenjiang | FEA          | -0.138 | <0.05              |

**Table S7.** Analysis of driving factors for CO, SO<sub>2</sub> and NO<sub>2</sub>.

| City      | Year      | Pollutant       | Emission control            | Meteorological variables    |
|-----------|-----------|-----------------|-----------------------------|-----------------------------|
| Nanjing   | 2013-2023 | CO              | -0.42 (mg m <sup>-3</sup> ) | 0.01 (mg m <sup>-3</sup> )  |
| Nanjing   | 2013-2023 | NO <sub>2</sub> | -20.99(μg m <sup>-3</sup> ) | -2.23(μg m <sup>-3</sup> )  |
| Nanjing   | 2013-2023 | SO <sub>2</sub> | -16.60(μg m <sup>-3</sup> ) | -2.65(μg m <sup>-3</sup> )  |
| Suzhou    | 2013-2023 | CO              | -0.12 (mg m <sup>-3</sup> ) | 0.03 (mg m <sup>-3</sup> )  |
| Suzhou    | 2013-2023 | NO <sub>2</sub> | -34.64(μg m <sup>-3</sup> ) | 2.17(μg m <sup>-3</sup> )   |
| Suzhou    | 2013-2023 | SO <sub>2</sub> | -21.60(μg m <sup>-3</sup> ) | 1.00(μg m <sup>-3</sup> )   |
| Xuzhou    | 2013-2023 | CO              | -0.83 (mg m <sup>-3</sup> ) | -0.02 (mg m <sup>-3</sup> ) |
| Xuzhou    | 2013-2023 | NO <sub>2</sub> | -18.52(μg m <sup>-3</sup> ) | -0.65(μg m <sup>-3</sup> )  |
| Xuzhou    | 2013-2023 | SO <sub>2</sub> | -42.74(μg m <sup>-3</sup> ) | 0.39(μg m <sup>-3</sup> )   |
| Zhenjiang | 2013-2023 | CO              | -0.57 (mg m <sup>-3</sup> ) | 0.03 (mg m <sup>-3</sup> )  |
| Zhenjiang | 2013-2023 | NO <sub>2</sub> | -3.18(μg m <sup>-3</sup> )  | -0.37(μg m <sup>-3</sup> )  |
| Zhenjiang | 2013-2023 | SO <sub>2</sub> | -28.40(μg m <sup>-3</sup> ) | 1.25(μg m <sup>-3</sup> )   |
